# Supplementary figures and images for: Anodic oxidation to produce persulfate for treatment of oilfield wastewater and synthesis of Fe(vi)
Source: Royal Society of Chemistry journal article supplement (doi:10.1039/d2ew00500j), 2022-01-01

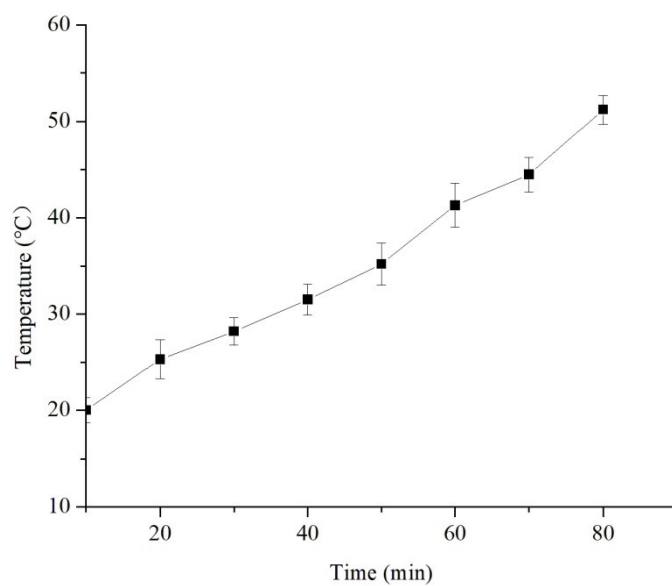

Fig. S1 Effect of electrolysis time on system temperature (pH=2.0, applied current = 1.2 A)

Supplement: d2ew00500j1.pdf [file d2ew00500j1.pdf]
